# Supplementary material for: Measures of Longitudinal Immune Dysfunction and Risk of AIDS and Non-AIDS Defining Malignancies in Antiretroviral-Treated People With Human Immunodeficiency Virus
Source: PubMed Central journal article supplement (PMC11006099; doi:10.1093/cid/ciad671), 2023-12-13

**Supplementary file to**

Chammartin F et al. Measures of longitudinal immune dysfunction and risk of AIDS and non-AIDS defining malignancies in antiretroviral treated people with HIV

Table S1. Baseline socio-demographic and clinical characteristics of people with HIV (PWH) in the RESPOND database and PWH included in the analysis

|                                           | Overall RESPOND database<br>(n=30816) | PWH included<br>in the analysis (n=19247) |
|-------------------------------------------|---------------------------------------|-------------------------------------------|
| <b>Age [year]</b>                         |                                       |                                           |
| < 50                                      | 21491 (69.7%)                         | 13698 (71.2%)                             |
| 50-65                                     | 7920 (25.7%)                          | 4746 (24.7%)                              |
| ≥ 65                                      | 1405 (4.6%)                           | 803 (4.2%)                                |
| <b>Mean age (interquartile range)</b>     | 44 (36-51)                            | 44 (36-51)                                |
| <b>Sex</b>                                |                                       |                                           |
| Male                                      | 23350 (75.8%)                         | 14715 (76.5%)                             |
| Female                                    | 7466 (24.2%)                          | 4532 (23.5%)                              |
| <b>Risk group</b>                         |                                       |                                           |
| Men having sex with men                   | 14313 (46.4%)                         | 9596 (49.9%)                              |
| People who inject drugs                   | 4337 (14.1%)                          | 1921 (10.0%)                              |
| Heterosexual                              | 10128 (32.9%)                         | 6544 (34.0%)                              |
| Other / unknown                           | 2038 (6.6%)                           | 1186 (6.2%)                               |
| <b>Race</b>                               |                                       |                                           |
| White                                     | 22106 (71.7%)                         | 12934 (67.2%)                             |
| Other / unknown                           | 8710 (28.3%)                          | 6313 (32.8%)                              |
| <b>CD4 cell count [cells/μl]</b>          |                                       |                                           |
| <350                                      | 5854 (23.5%)                          | 4731 (24.6%)                              |
| 350-500                                   | 5471 (22.0%)                          | 4233 (22.0%)                              |
| ≥ 500                                     | 13594 (54.5%)                         | 10283 (53.4%)                             |
| Missing                                   | 5897                                  |                                           |
| <b>CD8 cell count [cells/μl]</b>          |                                       |                                           |
| <1000                                     | 12545 (65.1%)                         | 12533 (65.1%)                             |
| ≥ 1000                                    | 6721 (34.9%)                          | 6714 (34.9%)                              |
| Missing                                   | 11550                                 |                                           |
| <b>CD4:CD8 ratio</b>                      |                                       |                                           |
| <0.5                                      | 7277 (37.8%)                          | 7271 (37.8%)                              |
| 0.5-1.0                                   | 8126 (42.2%)                          | 8119 (42.2%)                              |
| ≥ 1                                       | 3861 (20.0%)                          | 3857 (20.0%)                              |
| Missing                                   | 11552                                 |                                           |
| <b>HI viral load [copies/ml]</b>          |                                       |                                           |
| <200/detection limit                      | 17320 (69.5%)                         | 12590 (65.4%)                             |
| ≥200                                      | 7609 (30.5%)                          | 6657 (34.6%)                              |
| Missing                                   | 5887                                  |                                           |
| <b>Body mass index [kg/m<sup>2</sup>]</b> |                                       |                                           |
| <30                                       | 17177 (55.7%)                         | 12785 (66.4%)                             |
| ≥30                                       | 1471 (4.8%)                           | 1128 (5.9%)                               |
| Missing                                   | 12168 (39.5%)                         | 5334 (27.7%)                              |
| <b>Hepatitis C status</b>                 |                                       |                                           |
| Negative                                  | 17270 (56.0%)                         | 14029 (72.9%)                             |
| Positive                                  | 4959 (16.1%)                          | 2981 (15.5%)                              |
| Unknown                                   | 8587 (27.9%)                          | 2237 (11.6%)                              |

**Hepatitis B status**

|          |               |               |
|----------|---------------|---------------|
| Negative | 20807 (67.5%) | 16029 (83.3%) |
| Positive | 1101 (3.6%)   | 735 (3.8%)    |
| Unknown  | 8908 (28.9%)  | 2483 (12.9%)  |

**Smoking**

|         |              |              |
|---------|--------------|--------------|
| No      | 9739(31.6%)  | 7043 (36.6%) |
| Yes     | 8290 (26.9%) | 6018 (31.3%) |
| Unknown | 12787(41.5%) | 6186 (32.1%) |

---

PWH: people with HIV

Positive hepatitis B = positive surface antigen or detectable DNA; positive hepatitis C = positive antibody test or detectable RNA

Table S2: Model parameter estimates for non-AIDS and AIDS defining malignancies and composite endpoints of infection-, smoking-, and body mass index-related malignancies

|                                                        | Non-AIDS<br>defining<br>malignancy | AIDS-<br>defining<br>malignancy | Infection-<br>related<br>malignancy | Smoking-<br>related<br>malignancy | Body mass<br>index-related<br>malignancy |
|--------------------------------------------------------|------------------------------------|---------------------------------|-------------------------------------|-----------------------------------|------------------------------------------|
| <b>CD4:CD8 ratio lagged 12 months</b>                  |                                    |                                 |                                     |                                   |                                          |
| ≥1.0                                                   | 1                                  | 1                               | 1                                   | 1                                 | 1                                        |
| 0.5-1.0                                                | 1.01 (0.82-1.24)                   | 1.18 (0.53-2.64)                | 1.09 (0.72-1.63)                    | 1.14 (0.83-1.57)                  | 1.07 (0.71-1.64)                         |
| <0.5                                                   | 1.26 (0.93-1.70)                   | 2.61 (1.10-6.19)                | 2.03 (1.24-3.33)                    | 1.26 (0.81-1.95)                  | 1.03 (0.55-1.93)                         |
| <b>CD4 cell counts lagged 12 months<br/>(cells/μl)</b> |                                    |                                 |                                     |                                   |                                          |
| ≥500                                                   | 1                                  | 1                               | 1                                   | 1                                 | 1                                        |
| 350-500                                                | 1.08 (0.86-1.37)                   | 1.09 (0.61-1.96)                | 1.36 (0.94-1.97)                    | 0.98 (0.68-1.42)                  | 0.95 (0.58-1.56)                         |
| <350                                                   | 1.65 (1.26-2.15)                   | 3.48 (2.06-5.86)                | 2.62 (1.79-3.83)                    | 2.25 (1.56-3.23)                  | 1.74 (1.02-2.97)                         |
| <b>CD8 cell counts lagged 12 months<br/>(cells/μl)</b> |                                    |                                 |                                     |                                   |                                          |
| <1000                                                  | 1                                  | 1                               | 1                                   | 1                                 | 1                                        |
| ≥1000                                                  | 1.05 (0.85-1.30)                   | 1.05 (0.71-1.54)                | 1.07 (0.79-1.44)                    | 1.09 (0.81-1.47)                  | 0.97 (0.63-1.51)                         |
| <b>HI viral load lagged 12 months (copies/ml)</b>      |                                    |                                 |                                     |                                   |                                          |
| ≤200/lower detection limit                             | 1                                  | 1                               | 1                                   | 1                                 | 1                                        |
| >200                                                   | 0.97 (0.68-1.38)                   | 31.71 (20.10-<br>50.01)         | 6.33 (4.71-8.51)                    | 1.08 (0.66-1.75)                  | 0.98 (0.47-2.02)                         |
| <b>Age (year)</b>                                      | 1.07 (1.07-1.08)                   | 1.02 (1.01-1.04)                | 1.04 (1.03-1.05)                    | 1.08 (1.07-1.09)                  | 1.07 (1.05-1.08)                         |
| <b>Sex</b>                                             |                                    |                                 |                                     |                                   |                                          |
| Male                                                   | 1                                  | 1                               | 1                                   | 1                                 | 1                                        |
| Female                                                 | 0.97 (0.78-1.22)                   | 1.31 (0.83-2.06)                | 0.89 (0.62-1.27)                    | 0.91 (0.67-1.23)                  | 0.89 (0.58-1.37)                         |
| <b>Risk group</b>                                      |                                    |                                 |                                     |                                   |                                          |
| Men having sex with men                                | 1                                  | 1                               | 1                                   | 1                                 | 1                                        |
| People who inject drugs                                | 1.98 (1.57-2.51)                   | 0.62 (0.36-1.10)                | 0.67 (0.40-1.12)                    | 4.56 (3.31-6.28)                  | 3.95 (2.53-6.17)                         |
| Heterosexual                                           | 0.93 (0.75-1.14)                   | 0.55 (0.34-0.90)                | 0.73 (0.53-1.02)                    | 1.20 (0.86-1.67)                  | 1.23 (0.79-1.93)                         |
| Other/unknown                                          | 1.23 (0.88-1.71)                   | 1.03 (0.55-1.93)                | 1.14 (0.70-1.83)                    | 1.52 (0.90-2.57)                  | 1.42 (0.69-2.91)                         |
| <b>Race</b>                                            |                                    |                                 |                                     |                                   |                                          |
| White                                                  | 1                                  | 1                               | 1                                   | 1                                 | 1                                        |
| Other/Unknown                                          | 0.83 (0.68-1.01)                   | 1.07 (0.73-1.55)                | 1.14 (0.70-1.83)                    | 0.79 (0.58-1.09)                  | 1.07 (0.72-1.59)                         |
| <b>Hepatitis C status</b>                              |                                    |                                 |                                     |                                   |                                          |
| Negative                                               |                                    |                                 | 1                                   |                                   |                                          |
| Positive                                               |                                    |                                 | 1.47 (0.97-2.25)                    |                                   |                                          |
| Unknown                                                |                                    |                                 | 1.41 (0.88-2.26)                    |                                   |                                          |
| <b>Hepatitis B status</b>                              |                                    |                                 |                                     |                                   |                                          |
| Negative                                               |                                    |                                 | 1                                   |                                   |                                          |
| Positive                                               |                                    |                                 | 2.10 (1.34-3.29)                    |                                   |                                          |
| Unknown                                                |                                    |                                 | 1.00 (0.62-1.62)                    |                                   |                                          |
| <b>Smoking lagged 12 months</b>                        |                                    |                                 |                                     |                                   |                                          |
| No                                                     |                                    |                                 |                                     | 1                                 |                                          |
| Yes                                                    |                                    |                                 |                                     | 1.77 (1.33-2.37)                  |                                          |
| Unknown                                                |                                    |                                 |                                     | 1.11 (0.78-1.57)                  |                                          |
| <b>Obesity (BMI&gt;30 kg/m<sup>2</sup>)</b>            |                                    |                                 |                                     |                                   |                                          |
| No                                                     |                                    |                                 |                                     |                                   | 1                                        |
| Yes                                                    |                                    |                                 |                                     |                                   | 1.31 (0.75-2.29)                         |
| Unknown                                                |                                    |                                 |                                     |                                   | 0.59 (0.37-0.93)                         |

Positive hepatitis B = positive surface antigen or detectable DNA; positive hepatitis C = positive antibody test or detectable RNA



Figure S1: Adjusted hazard ratio of immunological and virological factors for non AIDS defining, AIDS defining, infection-, smoking- and body mass-related malignancies in a sensitivity analysis that considers additional forms of exposures

### Non-AIDS defining malignancy

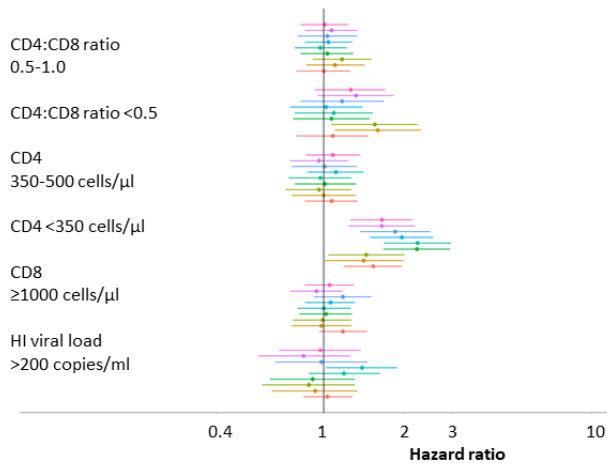

### AIDS defining malignancy

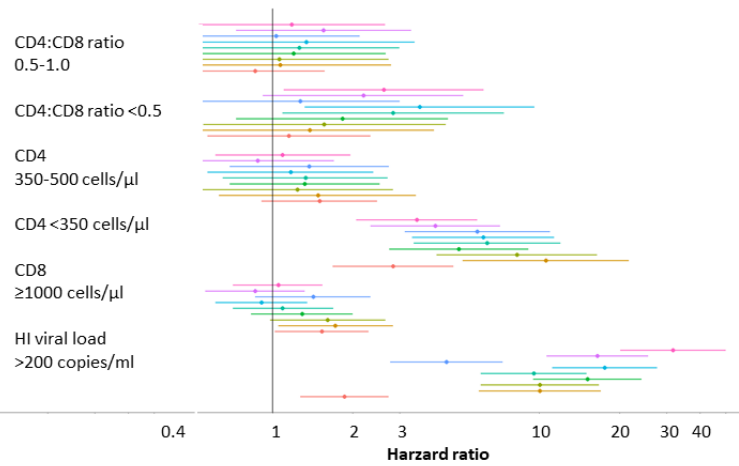

### Infection-related malignancy

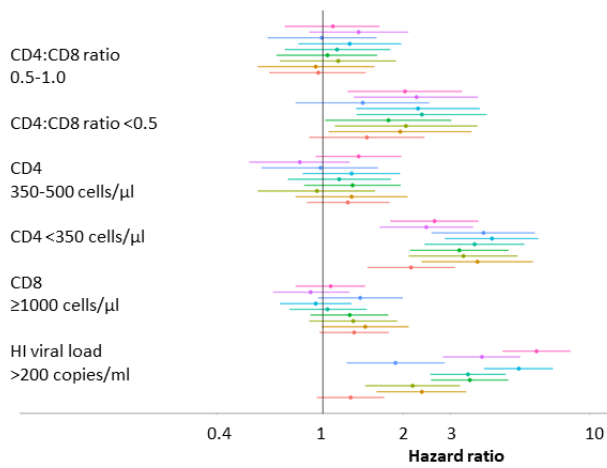

### Smoking-related malignancy

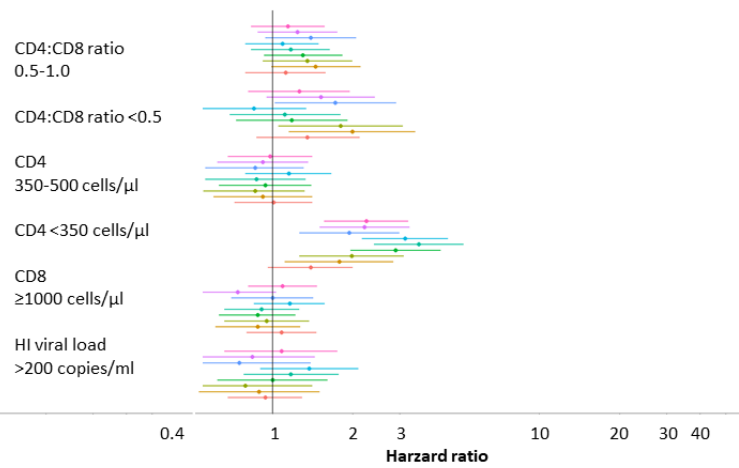

### Body mass index-related malignancy

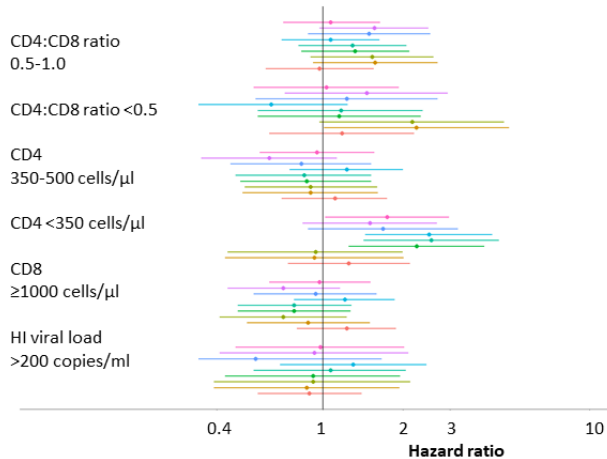

### Exposure form

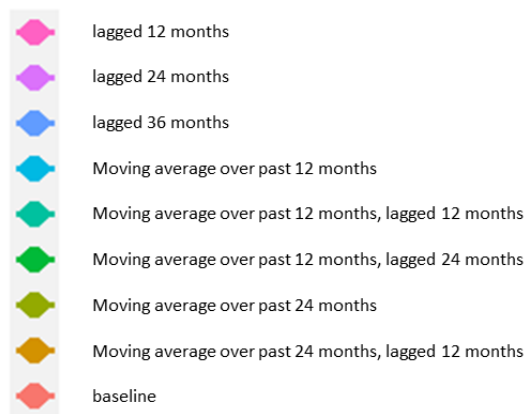

Figure S2: Adjusted hazard ratio of immunological and virological factors for non AIDS defining, AIDS defining, infection-, smoking-, and body mass-related malignancies in a sensitivity analysis that considers additional forms of exposures and restricted extrapolation of immunological and virological factors to 12 months

### Non-AIDS defining malignancy

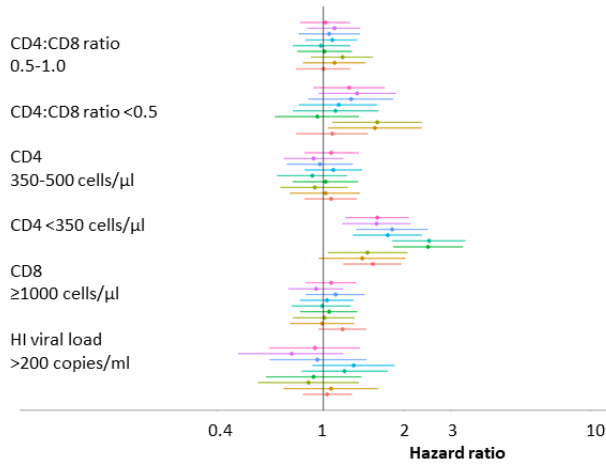

### AIDS defining malignancy

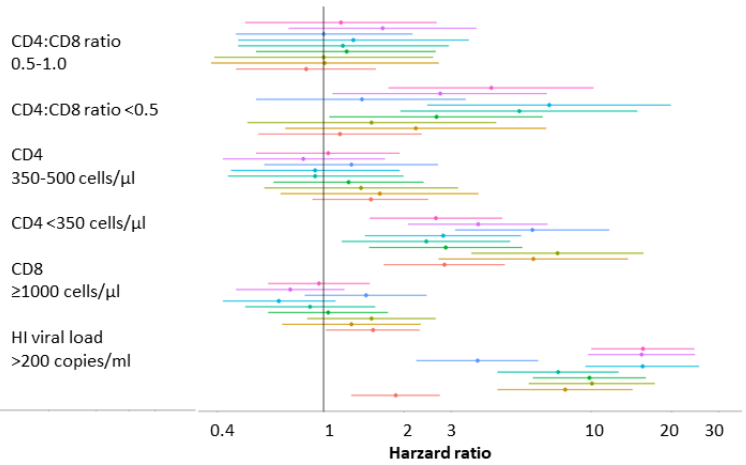

### Infection-related malignancy

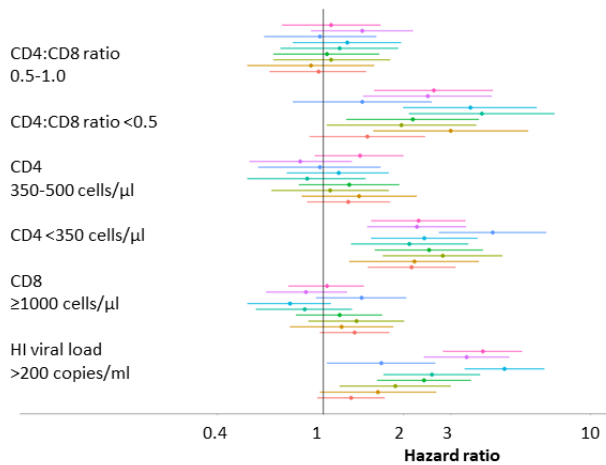

### Smoking-related malignancy

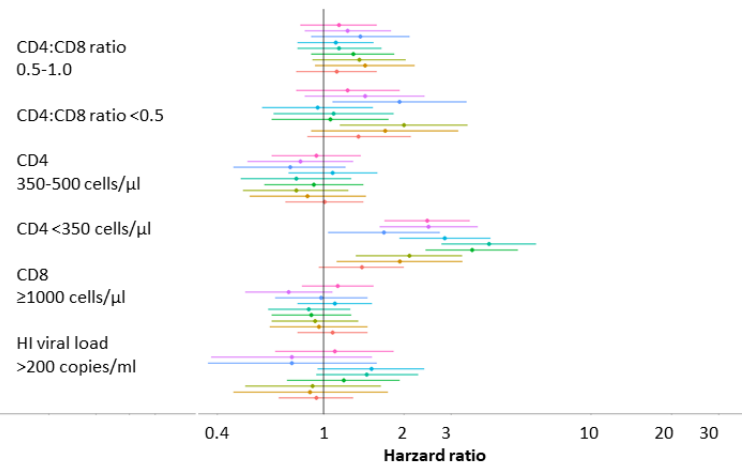

### Body mass index-related malignancy

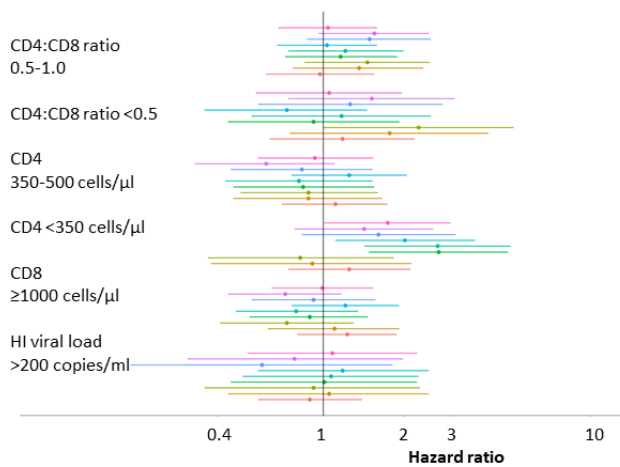

### Exposure form

- ◆ lagged 12 months
- ◆ lagged 24 months
- ◆ lagged 36 months
- ◆ Moving average over past 12 months
- ◆ Moving average over past 12 months, lagged 12 months
- ◆ Moving average over past 12 months, lagged 24 months
- ◆ Moving average over past 24 months
- ◆ Moving average over past 24 months, lagged 12 months
- ◆ baseline

Figure S3: Adjusted hazard ratio of immunological and virological factors for smoking-related malignancies in a sensitivity analysis that excludes individuals from cohorts with insufficient smoking information

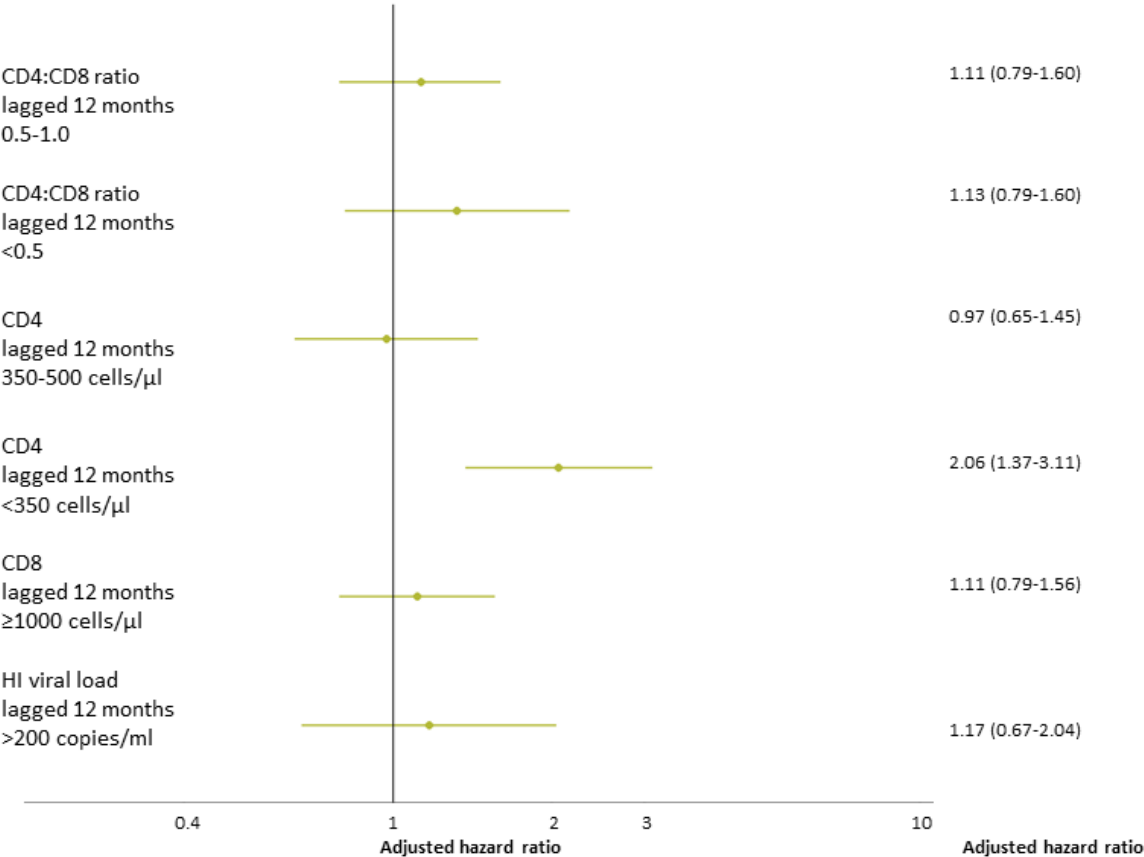

Figure S4: Adjusted hazard ratio of immunological and virological factors for smoking-related malignancies in a sensitivity analysis that excludes individuals from the EuroSIDA cohort that did not routinely collect CD8 cell counts

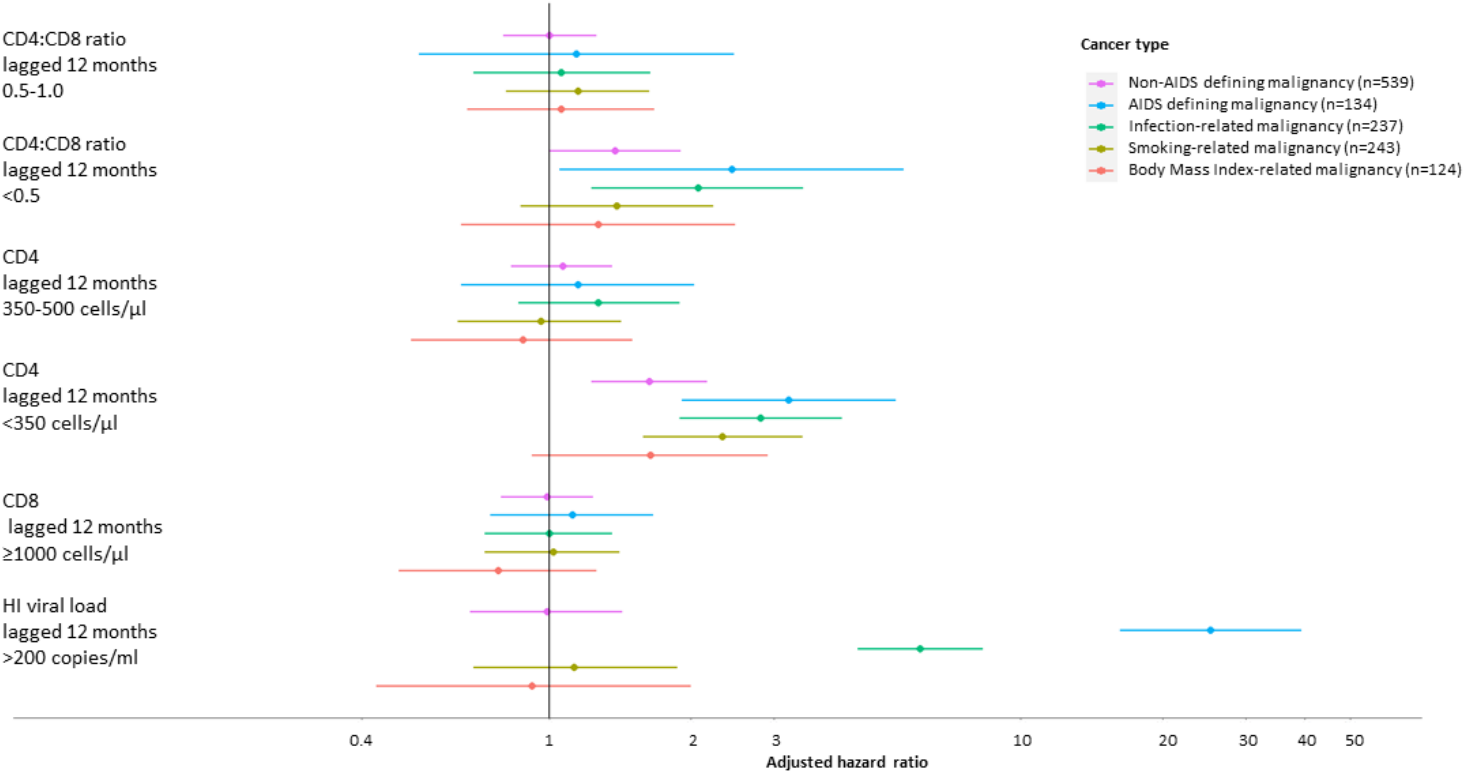

Supplement: ciad671_supplementary_data.pdf [file ciad671_supplementary_data.pdf]
